# Supplementary material for: Drug-Drug Interaction Extraction via Convolutional Neural Networks
Source: Hindawi journal article supplement (doi:10.1155/2016/6918381), 2016-01-01
Supplement: f1 [file 6918381.f1.pdf]

**Table S1. F-scores of our system and the top performing systems for each type of DDIs (%).**

|           | <b>Our system</b> | <b>Kim Sun</b> | <b>FBK-irst</b> | <b>WBI</b> |
|-----------|-------------------|----------------|-----------------|------------|
| Mechanism | <b>70.24</b>      | 69.30          | 67.90           | 61.80      |
| Effect    | <b>69.33</b>      | 66.20          | 62.80           | 61.00      |
| Advice    | <b>77.75</b>      | 72.50          | 69.20           | 63.20      |
| Int       | 46.38             | 48.30          | <b>54.70</b>    | 51.00      |
